# Supplementary material for: Facilitating charge transfer and band alignment in perovskite solar cells via interfacial regulation with a Nb2CTx MXene oxidized derivative
Source: Royal Society of Chemistry journal article supplement (doi:10.1039/d4ta03699a), 2024-01-01
Supplement: d4ta03699a1.pdf [file d4ta03699a1.pdf]

## Supplementary Material

### **Facilitating Charge Transfer and Band Alignment in Perovskite Solar Cells via Interfacial Regulation with Nb<sub>2</sub>CT<sub>x</sub> MXene Oxidized Derivative**

Lin Yang <sup>a, &</sup>, Ziyang Liu <sup>b, &</sup>, Tianfang Zheng, <sup>b</sup> Peng Li <sup>a</sup>, Jiangang Ma <sup>a, \*</sup>, Xintong  
Zhang <sup>a</sup>, Xiao-Feng Wang <sup>b, \*</sup>, Yichun Liu <sup>a</sup>

<sup>a</sup>Key Laboratory for UV-Emitting Materials and Technology of Ministry of Education,  
Northeast Normal University, 5268 Renmin Street, Changchun 130024, China

<sup>b</sup> Key Laboratory of Physics and Technology for Advanced Batteries (Ministry of  
Education), College of Physics, Jilin University, Changchun 130012, China

#### Corresponding Authors

\* Jiangang Ma, E-mail: majg@nenu.edu.cn

\* Xiao-Feng Wang, E-mail: xf\_wang@jlu.edu.cn

## Experimental Section

### Materials

Nb<sub>2</sub>AlC was sourced from Jilin 11 Technology Co., Ltd. Tetramethylammonium hydroxide (TMAOH 25% in water) was obtained from Alfa Aesar. Aladdin supplied 99% ascorbic acid (C<sub>6</sub>H<sub>8</sub>O<sub>6</sub>) and 49 wt % HF. *N,N*-dimethylformamide (DMF, 99.9%) Titanium (IV) isopropoxide, dimethyl sulfoxide (DMSO, 99.9%), chlorobenzene (CB, 99.8%), Isopropyl alcohol (IPA, 99.9%, ultra-dry) and 4-*tert*-butylpyridine (TBP, 96%) were purchased from Sigma Aldrich. Lead iodide (PbI<sub>2</sub>), Lead bromide (PbBr<sub>2</sub>), Formamidinium iodide (FAI), Methylammonium bromide (MABr), Cesium iodide (CsI), F-PEAI and Lithium bis (trifluoromethane sulphonyl) imide (Li-TFSI, 99.5%) were purchased from Xi'an Polymer Light Technology Corp. SnO<sub>2</sub> hydrocolloid, ITO glass substrates and Spiro-OMeTAD (99.8%) were purchased from Advanced Election Technology Co.

### Preparation of Multi-Layer Nb<sub>2</sub>CT<sub>x</sub> MXene

Multi-layer Nb<sub>2</sub>CT<sub>x</sub> MXene was fabricated from Nb<sub>2</sub>AlC MAX phase by etching the aluminum layer. Typically, 3g of Nb<sub>2</sub>AlC powder was added into 55 mL HF solution (49% wt%) and treated under continuously stirring for 72 h at 55 °C. Afterwards, the resulting mixture was centrifuged using deionized water at 8000 rpm multiple times until the pH reached 6. Finally, the multi-layer Nb<sub>2</sub>CT<sub>x</sub> MXene was obtained by drying the mixture under vacuum at 60 °C for 12 hours.

### Delamination of Few-Layer Nb<sub>2</sub>CT<sub>x</sub> MXene

Few-layer Nb<sub>2</sub>CT<sub>x</sub> MXene was exfoliated from multi-layer product above. 2 g multi-

layer Nb<sub>2</sub>CT<sub>x</sub> MXene powder was put into a Teflon-lined stainless-steel autoclave with 20 mL deionized water, 40 mL undiluted tetramethylammonium hydroxide (25% TMAOH), 1.0 g ascorbic acid and delaminated at 140 °C for 24 h. The product was then centrifuged at 8000 rpm to separate from excess impurities. Subsequently, deionized water was added to the product and sonicated for 60 min to further exfoliate the MXene. Finally, colloidal solution of the few-layer Nb<sub>2</sub>CT<sub>x</sub> was obtained via centrifuging the nanosheets at 3500 rpm for 1 h.

### **Device Fabrication**

ITO substrates were cleaned stepwise with detergent, deionized water, acetone, and ethanol, each for 30 min. After drying, the substrates were treated with UV-ozone for 20 min. SnO<sub>2</sub> hydrocolloid was spin-coated on ITO substrate at 4000 rpm for 40 s, followed by annealing at 150 °C for 30 min on the hot plate. For the fabrication of Nb<sub>2</sub>CT<sub>x</sub> derived layer, the Nb<sub>2</sub>CT<sub>x</sub> colloid was firstly diluted to 4 mg mL<sup>-1</sup> with deionized water. Then the aged colloid was spin-coated onto the UV-ozone treated ITO/SnO<sub>2</sub> substrate at 2000 rpm for 30 s, followed by annealing at 200 °C for 30 min. After that, the samples were transferred to a glovebox full of nitrogen. The perovskite precursor was prepared by mixing 1.4 M FAPbI<sub>3</sub> and MAPbBr<sub>3</sub> solution dissolved in DMF: DMSO (4:1 volume ratio) in a volume ratio of 19:1, while the FAPbI<sub>3</sub> and MAPbBr<sub>3</sub> were both contained 9% PbI<sub>2</sub>, PbBr<sub>2</sub> excess in sequence. Then, 1.5 M CsI in DMSO was prepared and mixed with the precursor solution described above in a volume ratio of 1:24. Besides, 15 mol% MACl was added to the precursor solution to obtain the final triple-cation perovskite precursor. 80 μL of the perovskite precursor

were spin coated onto the ETL substrates at 4000 rpm for 40 s, while 200  $\mu\text{L}$  mixed antisolvent with chlorobenzene and isopropanol in a volume ratio of 9:1 containing 0.5 mM F-PEAI was injected onto the film at 7 s before the end of spinning process. Then the perovskite film was obtained after annealing on the hot plate at 100  $^{\circ}\text{C}$  for 60 min. For the HTL, a solution of 80 mg Spiro-OMeTAD in 1 mL of chlorobenzene was prepared and spin-coated onto the perovskite layer at 4000 rpm for 30 s. In this solution, 35.5  $\mu\text{L}$  of a Li-TFSI acetonitrile solution with a concentration of 260  $\text{mg mL}^{-1}$  and 35  $\mu\text{L}$  of tBP were added. Finally, the Ag electrode was prepared by thermal evaporation on top of the Spiro-OMeTAD layer.

### **Characterizations**

The scanning electron microscopy (SEM) images of  $\text{Nb}_2\text{CT}_x$  MXene relevant materials and devices were measured by JSM-7900F (JEOL). transmission electron microscopy (TEM) and high-resolution transmission electron microscopy (HRTEM) images were recorded by JEM-2200FS (JEOL). X-Ray diffraction (XRD) measurements were obtained on Bruker D8 X-ray diffractometer with  $\text{CuK}\alpha$  radiation ( $\lambda = 1.5418 \text{ \AA}$ ) at room temperature. UV-vis absorption spectra were monitored by a Hitachi U4150 spectrophotometer over the wavelength range of 200-800 nm. UV-Ozone treatment was used by a BZS250GF-TS UV-ozone cleaner. Atomic force microscopy (AFM) images were obtained with Bruker Dimension Icon. Steady-state photoluminescence (PL) was monitored on Shimadzu RF-5301PC spectrophotometer, while time-resolved PL (TRPL) spectra were carried out by a PL spectrometer (Edinburgh Instruments, FLS 920) with the excitation wavelength at 475 nm. Electrochemical impedance

spectroscopy (EIS) measurement was obtained by a VSP multi-channel potentiostat-galvanostatic system (Biologic, France). Ultraviolet photoelectron spectroscopy (UPS) results were recorded by ThermoFisher ESCALAB 250Xi ( $h\nu = 21.22$  eV). The  $J$ - $V$  curves were carried out using a Keithley 2400 source meter measurement system under AM 1.5G. The EQE results were measured by CrowntechQTest Station 1000AD (SOFN INSTRUMENTS CO., LTD).

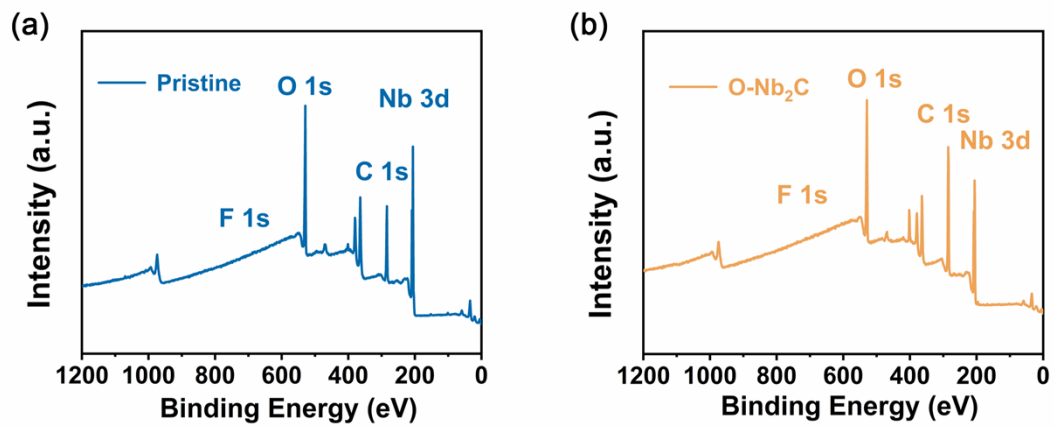

Figure S1. The full scan XPS spectra of (a) pristine  $\text{Nb}_2\text{CT}_x$  and (b)  $\text{O-Nb}_2\text{C}$ .

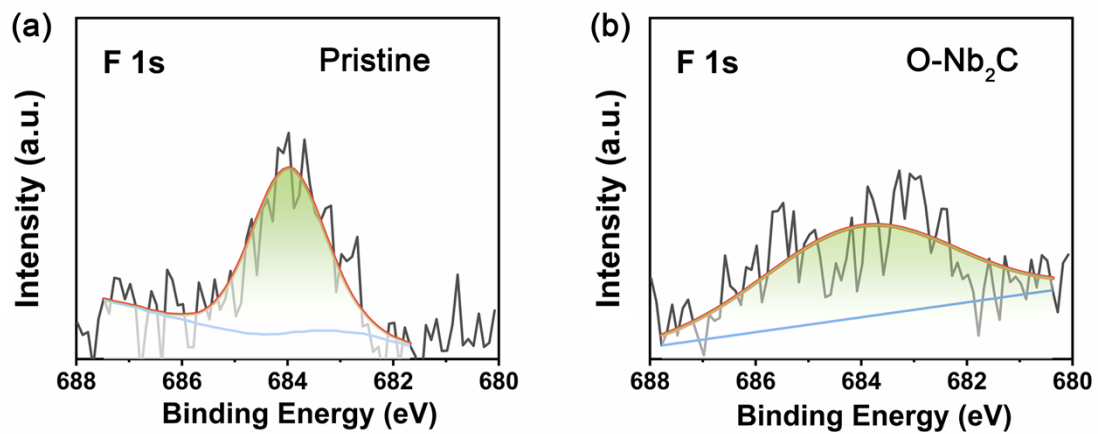

Figure S2. The fitted F 1s core-levels spectra of (a) pristine Nb<sub>2</sub>CT<sub>x</sub> and (b) O-Nb<sub>2</sub>C.

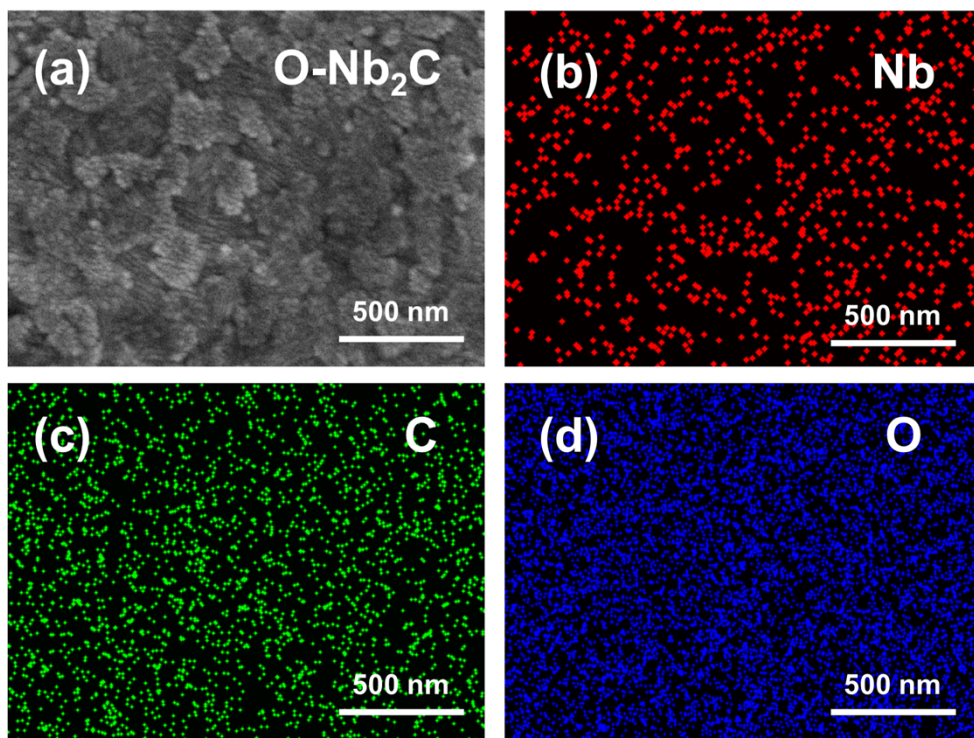

Figure S3. EDX elemental mapping images of (b) Nb (c) C (d) O for (a) O-Nb<sub>2</sub>C film fabricated by spin-coating.



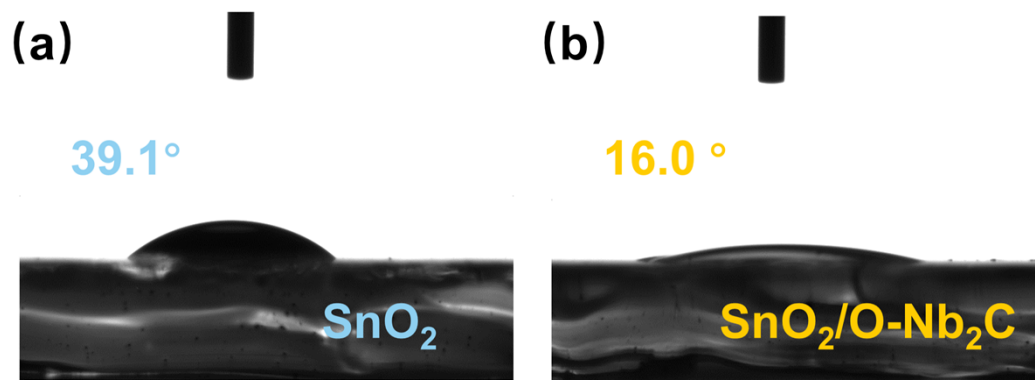

Figure S4. The contact angle measurements of water on (a)  $\text{SnO}_2$  and (b)  $\text{SnO}_2/\text{O-Nb}_2\text{C}$  substrates.

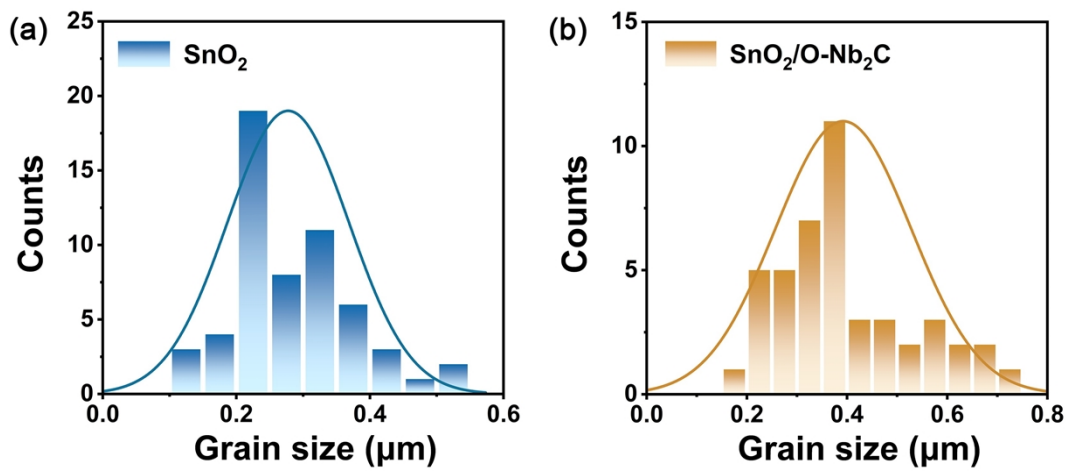

Figure S5. Grain size distributions calculated from the corresponding SEM images of the perovskite films based on (a) SnO<sub>2</sub> and (b) SnO<sub>2</sub>/O-Nb<sub>2</sub>C.

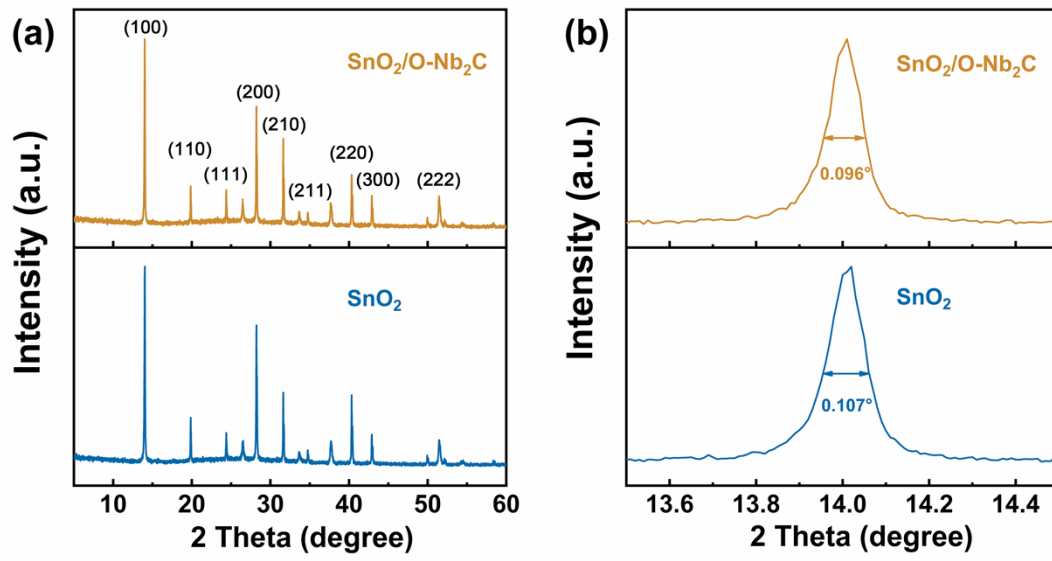

Figure S6. (a) XRD patterns and (b) their FWHM of the diffraction peak at about  $14^\circ$  of perovskite films based on  $\text{SnO}_2$  and  $\text{SnO}_2/\text{O-Nb}_2\text{C}$ .

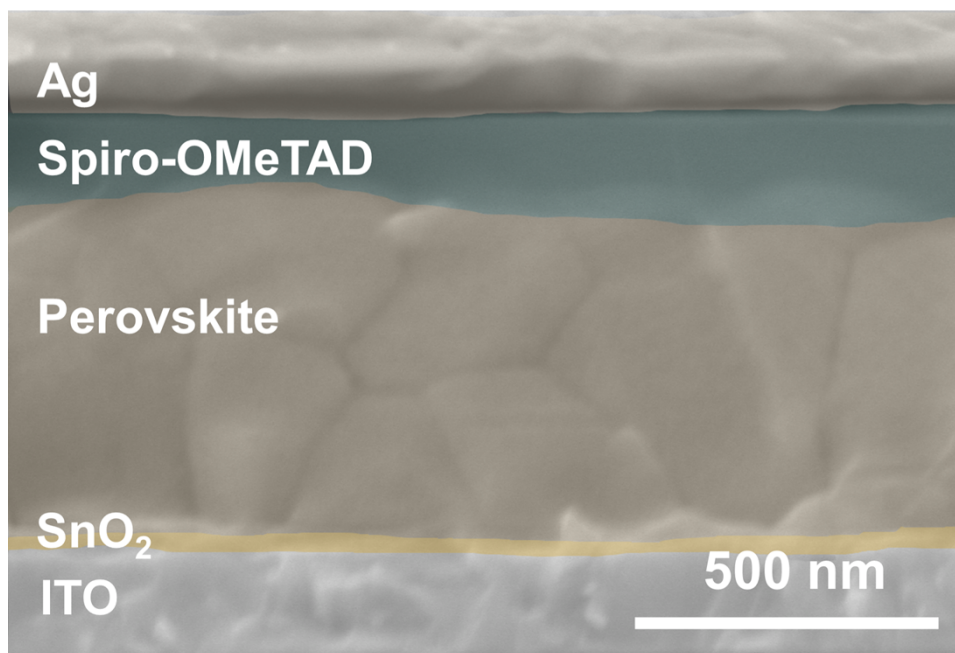

Figure S7. Cross-sectional SEM image of the PSC device based on SnO<sub>2</sub> ETL.

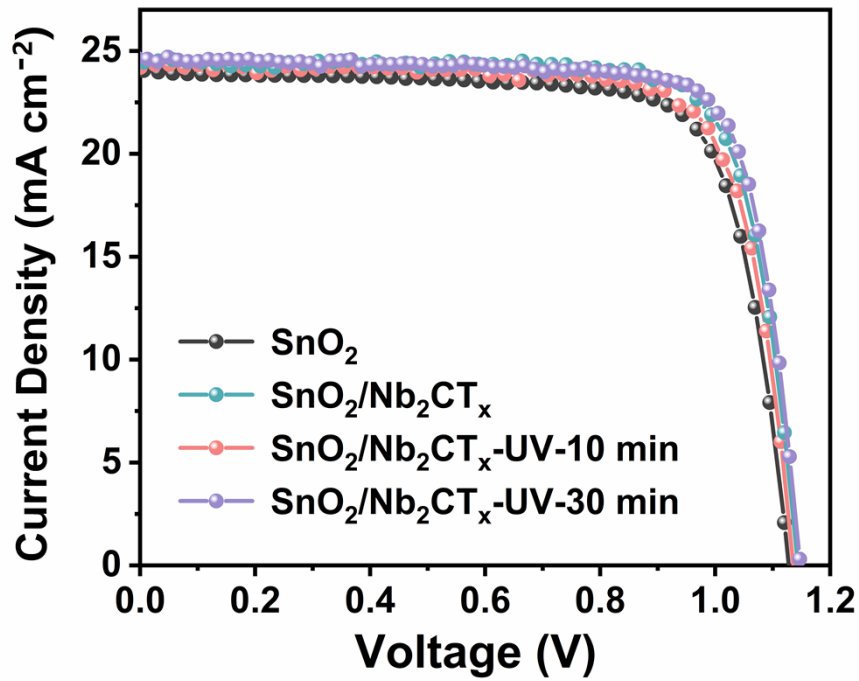

Figure S8.  $J$ - $V$  curves of devices based on Nb<sub>2</sub>CT<sub>x</sub> regulation without oxidation under AM 1.5 G simulated illumination

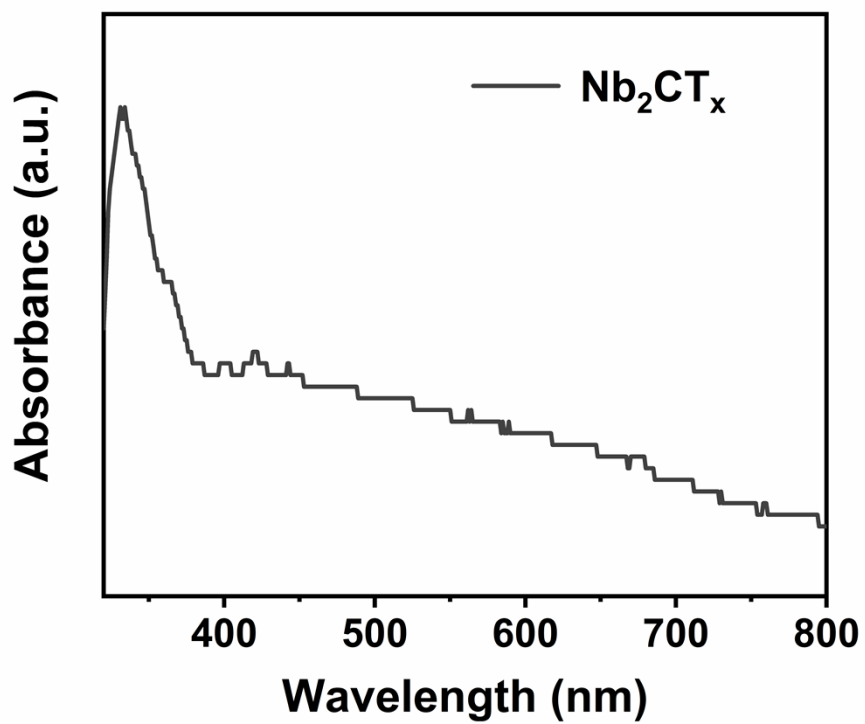

Figure S9. UV-vis absorption measurement of pristine Nb<sub>2</sub>CT<sub>x</sub> film.

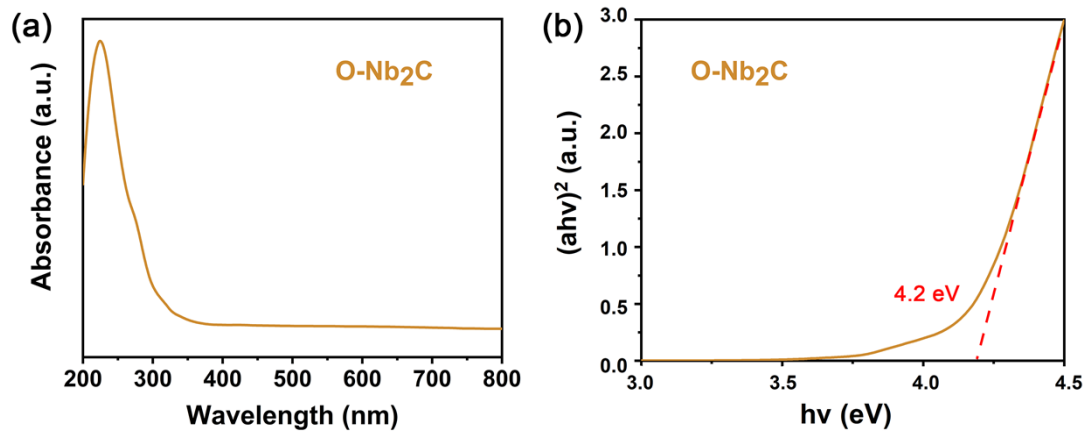

Figure S10. (a) UV-vis absorption measurement of O-Nb<sub>2</sub>C and (b) the curves of  $(ah\nu)^2$  versus  $h\nu$  derived from the optical absorption spectra.

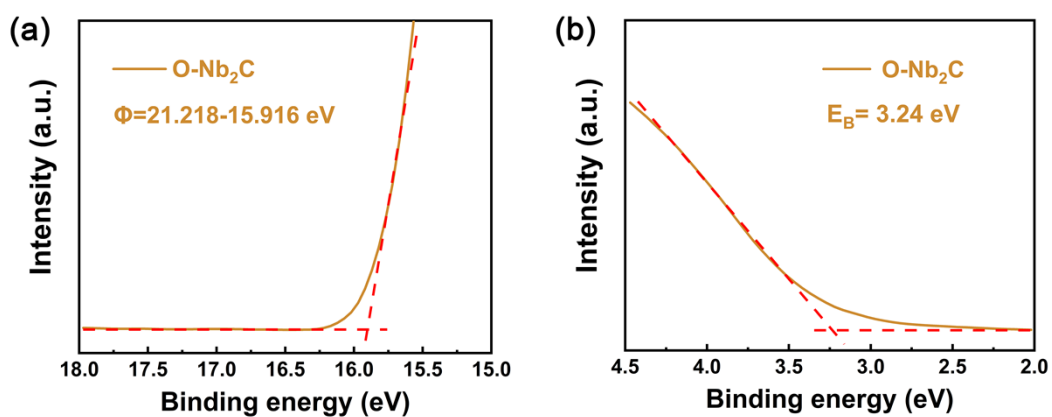

Figure S11. UPS results of O-Nb<sub>2</sub>C film. The HOMO energy levels were determined by the intersection of baseline with the tangent line of the spectra, that is, HOMO = –

$$(\Phi + E_B) \text{ (eV)}.$$



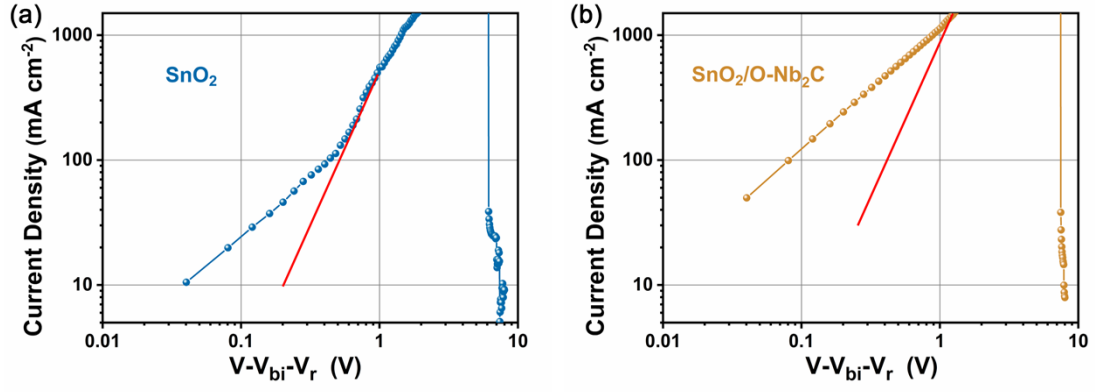

Figure S12. Typical  $J$ - $V$  curves for the devices based on (a)  $\text{SnO}_2$  and (b)  $\text{SnO}_2/\text{O-Nb}_2\text{C}$ .

The electron mobilities of ETLs were analyzed by the  $J$ - $V$  curves with the electron-only structure under dark, and were calculated with the following equation:

$$J = 9\varepsilon_0\varepsilon_r\mu(V - V_{bi} - V_r)^2/8L^3$$

where  $\mu$  is electron mobility ( $\text{cm}^2 \text{V}^{-1} \text{s}^{-1}$ ),  $J$  represents the current density ( $\text{mA cm}^{-2}$ ),  $\varepsilon_0$  indicates the permittivity of free space ( $\text{mA s V}^{-1} \text{cm}^{-1}$ ),  $\varepsilon_r$  represents the dielectric constant of ETLs,  $V$  is the applied voltage (V),  $V_r$  is the voltage drop (V) due to the series resistance and contact resistance across the electrodes,  $V_{bi}$  is the built-in voltage (V),  $V - V_{bi} - V_r$  is obtained through a slope in the double log plot equals to 2, and  $L$  is the thickness of ETLs film.

Table S1. The photovoltaic performance parameters of the devices with and without Nb<sub>2</sub>CT<sub>x</sub> modification.

|                                                              | $V_{oc}$ (V) | $J_{sc}$ (mA cm <sup>-2</sup> ) | FF   | PCE (%) |
|--------------------------------------------------------------|--------------|---------------------------------|------|---------|
| SnO <sub>2</sub>                                             | 1.128        | 24.02                           | 0.76 | 20.51   |
| SnO <sub>2</sub> /Nb <sub>2</sub> CT <sub>x</sub>            | 1.136        | 24.23                           | 0.77 | 21.19   |
| SnO <sub>2</sub> /Nb <sub>2</sub> CT <sub>x</sub> -UV-10 min | 1.145        | 24.50                           | 0.78 | 21.88   |
| SnO <sub>2</sub> /Nb <sub>2</sub> CT <sub>x</sub> -UV-30 min | 1.148        | 24.66                           | 0.78 | 22.08   |

Table S2. The fitted lifetime parameters originated from the TRPL measurements in Figure 5c.

| Sample Structures                                      | $\tau_1$ ( $\mu$ s) | A <sub>1</sub> | $\tau_2$ ( $\mu$ s) | A <sub>2</sub> | B      | $\tau_{ave}$ ( $\mu$ s) |
|--------------------------------------------------------|---------------------|----------------|---------------------|----------------|--------|-------------------------|
| Glass/perovskite                                       | 1.646               | 405.160        | 10.730              | 255.818        | 22.366 | 8.954                   |
| Glass/SnO <sub>2</sub> /perovskite                     | 1.582               | 462.754        | 8.217               | 256.817        | 10.016 | 6.508                   |
| Glass/SnO <sub>2</sub> /O-Nb <sub>2</sub> C/perovskite | 0.718               | 274.226        | 6.393               | 255.308        | 10.599 | 5.782                   |

The TRPL spectra are fitted using the bi-exponential decay function as equation below:

$$f(t) = A_1 \exp[-t/\tau_1] + A_2 \exp[-t/\tau_2] + B$$

where A<sub>i</sub> is the decay amplitudes,  $\tau_i$  is the decay lifetime, and B is constant. The average lifetimes ( $\tau_{ave}$ ) are calculated according to the equation:

$$\tau_{ave} = \frac{\sum A_i \tau_i^2}{\sum A_i \tau_i}$$

Table S3. EIS fitting results for the devices with and without the regulation of O-Nb<sub>2</sub>C.

| Sample                                | $R_{tr}$ (k $\Omega$ ) | $R_{rec}$ (k $\Omega$ ) |
|---------------------------------------|------------------------|-------------------------|
| SnO <sub>2</sub>                      | 140                    | 1400                    |
| SnO <sub>2</sub> /O-Nb <sub>2</sub> C | 33                     | 1600                    |
